# Supplementary material
Source: publisher site journal article supplement (https://en-cdn.bio-protocol.org/attached/file/20180626/2922%20Appendix%201.docx)
Supplement: Supplementary file 1 [file 2922%20Appendix%201.docx]

**Appendix 1: FASTA protein sequences of competence proteins in *L. lactis* subsp. *lactis* KF147**

>ComC_*Lactococcus*_*lactis*_*lactis*_KF147_acession_number_ADA65786.1

MDILFIFVIGSIFGSFFGLIVDRIPLRKSIIFGRSHCDSCQQLLAYRDLIPIFSQISSGSHCRYCKSKIPYLYVFLEFSSALIFVLAWVNYLKPSQFLLIILSLILSAFDYRQHSFPFVIWFIFALSFILIFPLSPLFYFWLILAVLAEKFNLRVGSGDFLWFFTASFSLTFLNEMLLLQIACSLGIIYYLITKKRAEIAFIPFLTIAYLMLLFGHQILSP

>ComEA_*Lactococcus*_*lactis*_*lactis*_KF147_acession_number_ADA65520.1

MDKILEKVKEYWKMIVLIVCGLIAGGIFYVLTNGQKPTTNLSVENLSSVSRQSSVSKFSEPNEKSVSKIMVDLKGAVTKPNVYQISPDERLVDLIKEAGGFTDQADQKSINLSAKLKDEEVIYVPKIGENSSTENTDSSANSVTSQVSTTTEKININQADVTELQKLTGVGQKKAQDIIDFRTKNGDFISLEDLGKVSGFGDKTLEKLKDELCFE

>ComEC_*Lactococcus*_*lactis*_*lactis*_KF147_acession_number_ADA65519.1

MSCVLNKIPLIFLAYLSVILYFLIFNFNLICLILFIFSSLLALYRKYYLVIPFLLVMGSFFLVVKMDTIKNSENQPTTLSKITMIPDTIQVNGDLLSFQGKERGQNYQVYETLKSKKEQKFYQNLSQNCQLSFTGNLQIPEKQRNFNGFDNQKYLASQNIYRQITIDKINKIVLNDTFDLHVLRRKAIVWSQTHFPKPMNDYMTGLLFGFLSKDFNQMGDIYSSLGIIHLFALSGMQVNFFIDWFRRIILRLGITREKLNIWQIPFSIFYAFMTGFSVSVLRALFQKNIRLNPLDNLAVT

TFLLMIVSPKFLLTTGGQLTLFYAFVISMINHKFSELKEIRKLLTESSVISLSVLPLLILDFHIFQPFSILLTIGFGFLFDVILLPLLLGTFLLSLIGYNFNINHIFQILEWLIHEVDLPLHYPLVLGNPRPIELLILFFLIGLLIDNLFKKRRQIIFAGLIVCSFFICKNPVYPSITAVDIGQGDSIFLQDKFNKKTILIDTGGRLALPQESWQKPQSQTNAEKTLIPYLESVGVSQIDQLILTHTDADHVGDFLNLADKIKIKEIWVSPGELTNNHFVEKLKKANIAIHISKVGDEIP

IFDSALQVLSNGYTGKGDNNDSIVTYGNFYHTKFLFTGDLEQEGEKELLKNYPKLKVDVLKVGHHGSKTSSNPDFIKEINPKLALISVGKENRYGHPNQETLETFKKYQIRILRTDQKGALKLMQINQQWRIQTVR

>ComFA_*Lactococcus*_*lactis*_*lactis*_KF147_acession_number_ ADA64820.1

MSTNQEKLFGRLLLKNDILQLIKSTDKISVSKIFSNFLLEAKVNPILGMTSISSNKIKCNRCGTVHIKNSVKLPIGVLYCPSCIQLGRVRSDEFLYFLPQKNFPKKSYINWSGKLTENQKSISNALCQEINSHQQIIVQAVTGAGKTEMIYQVIEQILESGGVVGLASPRIDVCLELHQRLSRDFSCKIPLLYHDGDNYFRAPLIIMTSHQLLRFKEAFDLLIIDEVDAFPFRDNEMLYFAAEKARKIEGNLIYLTATSTDKLEKDIKKQKLYPLFLPRRFHNFPLVVPKFFWKNKFDKK

LIEQRNSGFPLLIFAAEIEFGQEFAKQLQLKFPKEKITSVASTTKDRLEIVKAFRNKEITILIATSILERGVTFPNVDVFVINSEHPNFTKSALIQMAGRVGRSSERPTGLVSFFHYGKSKAMCQAVREIKKMNQLGGFS

>ComFC_*Lactococcus*_*lactis*_*lactis*_KF147_acession_number_ADA64819.1

MIKCLLCSRNIAQNFLFSELFLLKSPQNLLCSKCQKNFEKIPEAHCPCCCKPNVHEICTDCQNWEKRGYKIRHQAIFHYNQAMKDYFSQYKFVGDYRLYQIFEPYFKNISQKSPLVPIPISPKRLEERGFNQVTAFLQQENFIELLEKENSVKQSSLNRKERLESPNPFRLKKGLKVPTKVILIDDIYTTGTTLYHASQILKEAGVHEIRSFSLCR

>ComGA_*Lactococcus*_*lactis*_*lactis*_KF147_acession_number_ADA65921.1

MIPKMAKELIQKAIDRGASDIYLIASKEKYKLYFRQMTARVLVEEIGLEVGLALLTHFKFLAGMNTGERRRVQLGACWYELEESNAKRLRLSTVGDFEGNESLVIRLLHDQNKELDFWFDEELENYDCKRGLHLFADPVGSGKTSLMFDLARRHFTDLQVITIEEPVELIDSDFIQLQVNEVIGNSYDELIKLSLRHRPDLLIVGEIRDKLTAQAVLRASLTGYTVFSTVHAASVRGVIQRLSELGLSHWEIKNALSSVVYQRLIAGKGVLDIAKNKFESWSSENWNKKIDQLLTNGYLT

PTEAKREKIKTD

>ComGB_*Lactococcus*_*lactis*_*lactis*_KF147_acession_number_ADA65920.1

MSLGHQKIGIKKLISYLQMDISHLLKPRGKKLRLIKQAKLIQLMGNLLNSGFNLGEVINFLSLSKLVEKEFTLKMKEGLASGQALSELLESLSFSKNVVTQLALVEVHGNLSGTMQLVELHLKKQLKVKNKLVEVATYPILLLIFLVGIMWGLKNYLLPQLNSGSNFATLLINHLPLVFFSFGAFIFLLTAFSVTLFKRKSAIMNFTFLVKLPLVHSFIRLYLTAYFAREWGNLIAQGVELRQIINLMKKQKSRIFSEVGKNLDLELNAGRSFEQAVSKLALFLPELSLMIEYGAIKDKL

GLELSLYADECWEQFFTKIDRLMQLIQPLVFIFVALMIILLYAAMLLPIYSNMGSGI

>ComGC_*Lactococcus*_*lactis*_*lactis*_KF147_acession_number_ADA65919.1

MERTKKFILKKIQKIFLFVKICEKKCRQKELRAFTLIEMLIVLAIISILILLFVPNLIKEKSQVQKTGEAAVVKVVESQAQLYELDHDDEKPSLSELLSAGMITQKQISAYDNYYDQNKNEERNFND

>ComGD_*Lactococcus*_*lactis*_*lactis*_KF147_acession_number_ADA65918.1

MIRIKMKNEILMTRAFTLLESLLVLLIISFITTLFSLEIIQTVHLFKGELFVLQFENFYKRSQEDAALLQKSESLVAKNQELICEDRSITIPKEVAVKDFTVKFDDKGGNSSLQKLTIFLPYEKKFITYQLEIGSGKFKKKIS

>ComGE_*Lactococcus*_*lactis*_*lactis*_KF147_acession_number_ADA65917.1

MENLKRKSVKAYLLLESLISIALLAFLVSFIVSSLVQVRQKDTEENQKIEALNVAQMAIESHLTELSINGSDIKIKENQNLLIISNHGKEIMRLELQS

>ComGF_*Lactococcus*_*lactis*_*lactis*_KF147_acession_number_yvioADA65916.1

MNFKVKAFTLLECLVALLAISGSVLVISGLTKMLKEQLGISQSDSIKDWQIFCQQMRFELSGTKLDKVEQNFLYVTKDKKLRFGFMSDDFRKTDDKGQGYQPMLYDIKAAKIQATKNLITIRIDFNQGGERTFIYQFPEDT

>ComGG_*Lactococcus*_*lactis*_*lactis*_KF147_yviH_acession_number_ADA65915.1

MFSMFLKFYLQRQIDDARQLRSEKEQLTAELMVSIALKTDLKSQGQIHFDSGDLSYNLLTDSSASSKITDHSSDEKTYQFSIHLKDGTNFQIKN

>ComX_*Lactococcus*_*lactis*_*lactis*_KF147_acession_number_ADA65942.1

MTYYLEEEDFENLFSEMKPIVMKLMKQIRIRTWKIEDYLQEGMIILHLLLEEQSDGQKLHTKFKVKYHQRLIDELRRSYAKKRSHDHFIGLDVYECSDWINSGDTSPDNEVVFNHLLAEVYEGLSAHYQDLLLRQMRGEELTRMQRYRLREKIKAILFSEDEE

>CoiA_*Lactococcus*_*lactis*_*lactis*_KF147_acession_number_ADA65474.1

MLTAIDENGQVVNLLEIEVKELTGKYFCPSCKSELFIKNGEIKMTHFAHKSLKACDLWLENESEQHLGLKKALYQWFKKTDKVEIEAYIPEFKQRPDLLVNDKIAIEIQCSHLSTKRLKERTENYQVHGFTVLWLMGQDLWLKEQITELQKNLVYFSENRGFYYWELDFKAQKMRLKSLIHEDLRGKIIYLQEEIPFGEGRLIEQLRLPFLSQKLLTIPLIVDLKLAEFIRQQLYYCSPKWLKLQEKYYQRGENLLNLTFERSFIAPLGLNLLEVFDDKIPLHKFTQIKQNINLYYENFL

INFQQNSFKAVYPPRFYAIMKKQKKDMNE

>SsbA_*Lactococcus*_*lactis*_*lactis*_KF147_acession_number_ADA64212.1

MNKTMLIGRLTSAPEISKTTNDKSYVRVTLAVNRRFKNEKGEREADFISIIIWGKSAETLVSYAKKGSLISIEGEIRTRNYTDKQNQKHYVTEILGLSYDLLESRATIALRESAVKTEETLLDAEELPF

>SsbB_ssb2_*Lactococcus*_*lactis*_*lactis*_KF147_acession_number_ADA65984.1

MINNVVLVGRITRDPELRYTPQNQAVATFSLAVNRQFKNANGEREADFINCVIWRQQAENLANWAKKGALIGVTGRIQTRNYENQQGQRVYVTEVVADSFQMLESRSAREGMGGGTSAGSYSAPSQSTNNTPRPQTNNNNATPNFGRDADPFGSSPMEISDDDLPF

>RecA_*Lactococcus*_*lactis*_*lactis*_KF147_acession_number_ADA64179.1

MATKKKTNFDDITKKYGAERDKALADALALIEKDFGKGSLMRLGEAANQKVSVVSSGSLALDIALGAGGYPKGRIVEIYGPESSGKTTVALHAVAAVQKEGGIAAFIDAENALDPEYAKALGVNIDELLLSQPDYGEQGLQIAEKLITSGAVDLVVIDSVAALVPKAEIDGEIGDSSVGLQARMMSQAMRKLAGHINKTKTTAIFINQLREKVGVMFGSPETTPGGRALKFYASVRLDVRGSTKIEEGSGDNKTQIGKITKIKVVKNKVAPPFKVALVDIMFGEGISRTGELLNIAVDEG

IIKKSGAWFAYNDEKIGQGAEKAKNYLKEHQEIFDEIDHKVRAAHGLLDEAEVVETTEDTSTKAKATKAKKEEKVVETEEIELELED

>DprA_smf_*Lactococcus*_*lactis*_*lactis*_KF147_acession_number_ADA64958.1

MITNFDLYRWKKAGMTNLGVNKLLKFFHRYDKKISLRQMGQVAQLKSIPNFIEQYKNQDVSKLREEYKIYPSFSLLDEIYPERLKEIYNPPVLLFYQGDIRLLKTPKLAFVGSRQASSQGIKAVQKIVTELNQNFTIVSGLAKGIDTASHLSAIKNKIPTIAVIGTGLDIFYPLENRKIQEYLAKNQLILSEYSVGEKPLRYHFPERNRIIAGLSHGVVVIEAKLRSGSLITCERALEEGRDIFAVPGNIADGFSDGCNHLIQQGAKLIYQAQDILEEYLYD
